# Supplementary material for: GCAF(TMEM251) regulates lysosome biogenesis by activating the mannose-6-phosphate pathway
Source: PubMed Central journal article supplement (PMC9468337; doi:10.1038/s41467-022-33025-1), 2022-09-12
Supplement: 41467_2022_33025_MOESM1_ESM.pdf [file 41467_2022_33025_MOESM1_ESM.pdf]

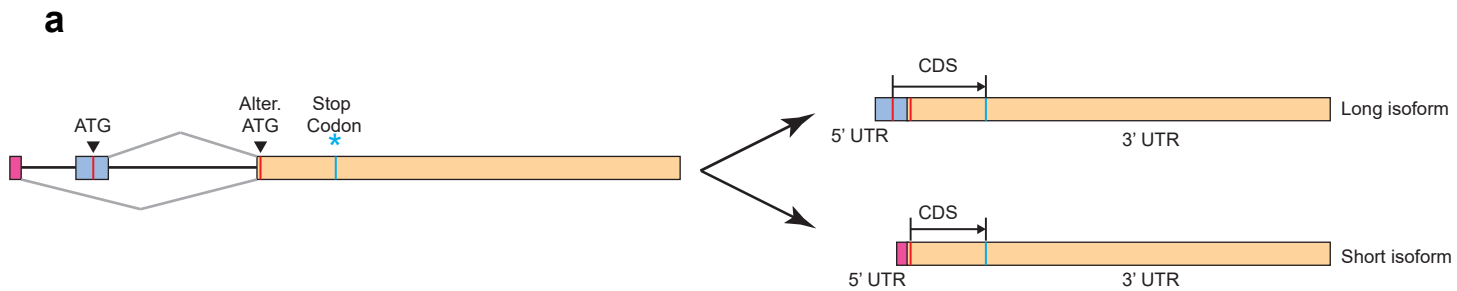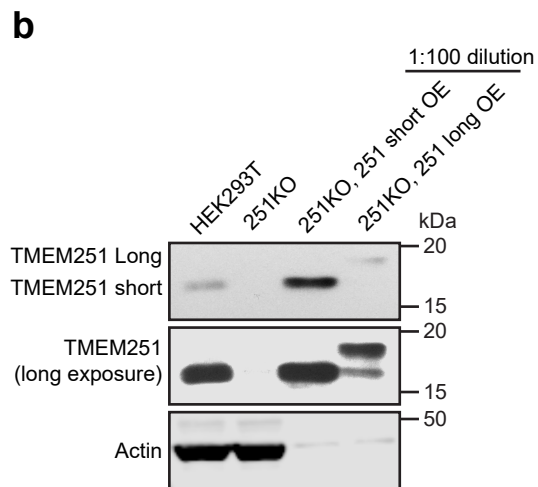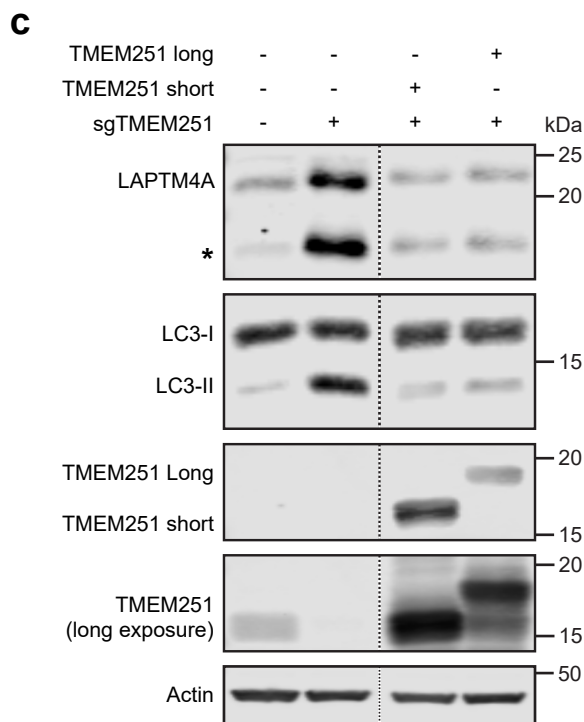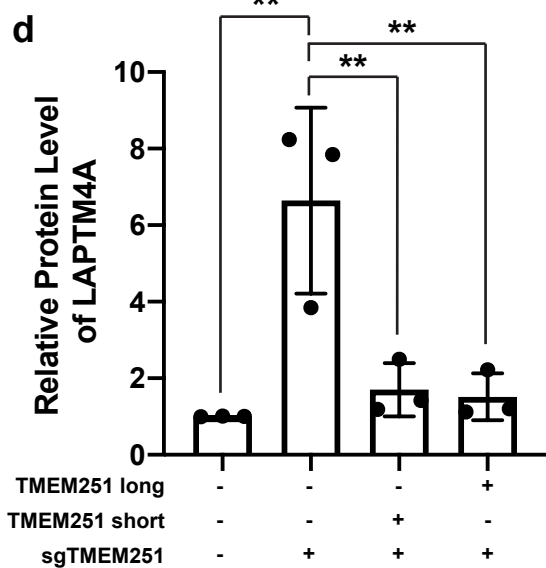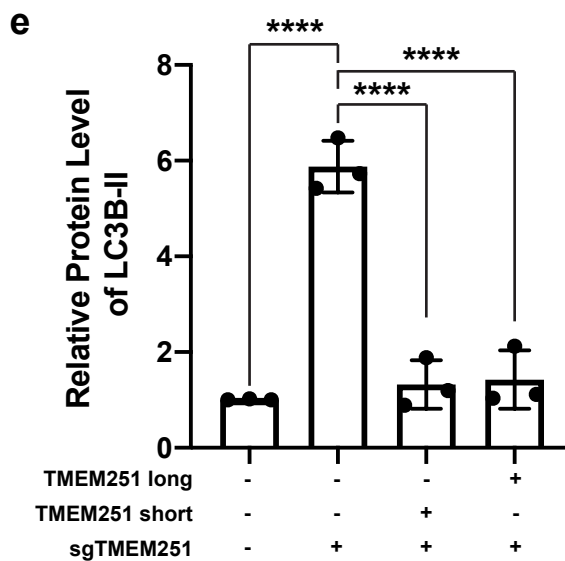

**Supplementary Figure 1: Transcriptional variants of TMEM251.** (a) A schematic representation of the alternative splicing of TMEM251 mRNA. (b) Endogenous TMEM251 and the overexpression of different isoforms of TMEM251 in HEK293T cells (n=3 independent replicates). The overexpression samples were diluted to make them comparable to the endogenous TMEM251. (c) Overexpression of either short or long isoform of TMEM251 rescues LAPTM4A and LC3B-II protein levels in TMEM251-deficient cells. \* highlights the cleavage product of LAPTM4A. (d) Quantification of LAPTM4A protein level in c. Mean of n=3 independent replicates is shown. Error bars represent standard deviation. \*\*:  $p \leq 0.01$ . (e) Quantification of LC3B-II protein level in c. Mean of n=3 independent replicates is shown. Error bars represent standard deviation. \*\*\*\*:  $p \leq 0.0001$ . See source data file for exact P values. Related to Figure 2.



HeLa, WT, unstained

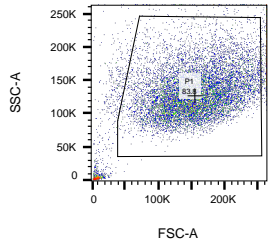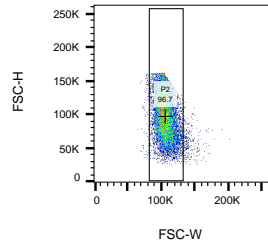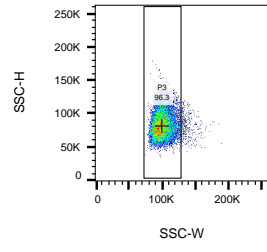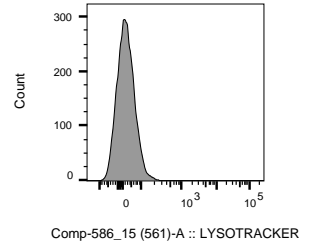

HeLa, WT

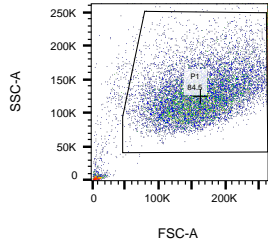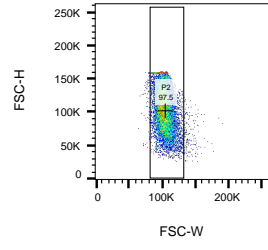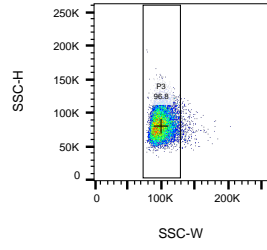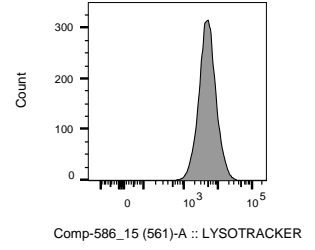

HeLa, sgTM251

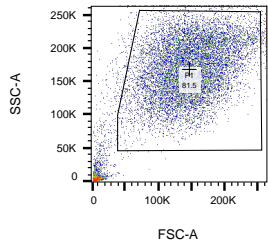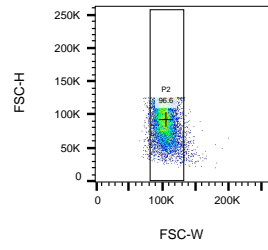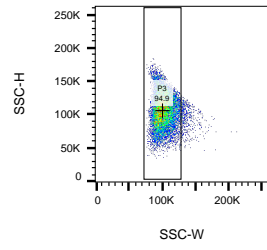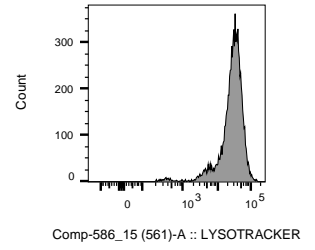

HEK293, WT, unstained

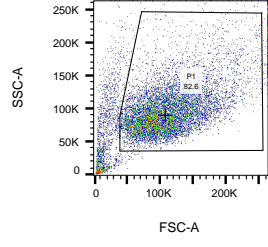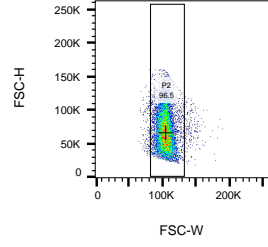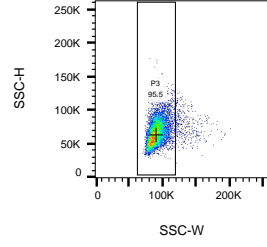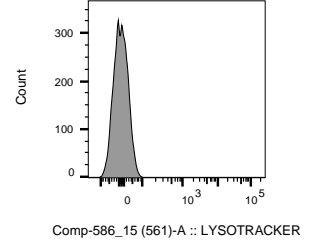

HEK293, WT

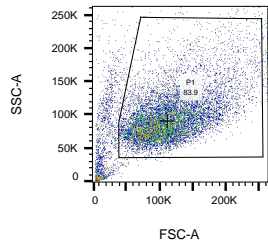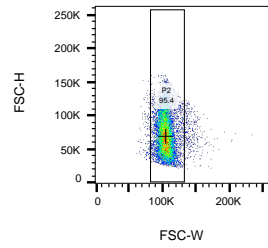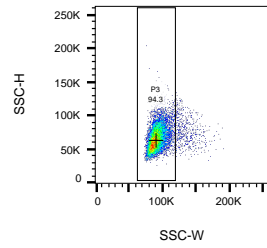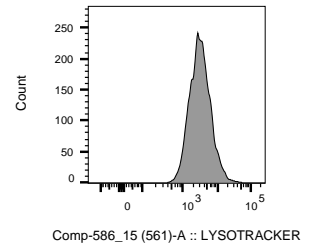

HEK293, sgTM251

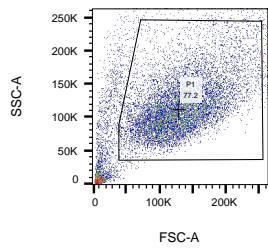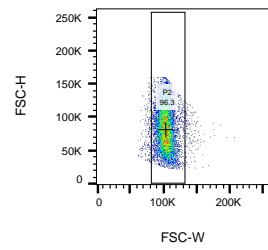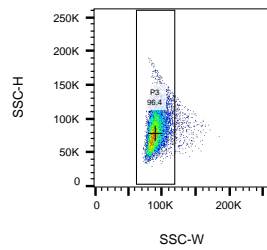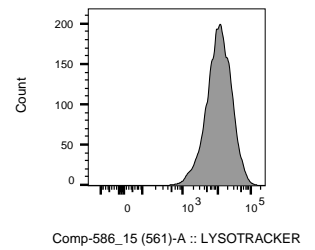

**Supplementary Figure 2: Gating strategy for the flow cytometry analysis after LysoTracker staining.** Related to Figure 3.

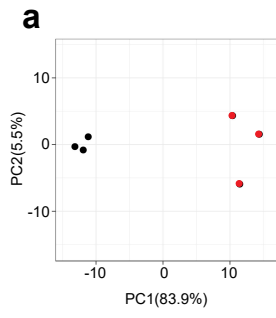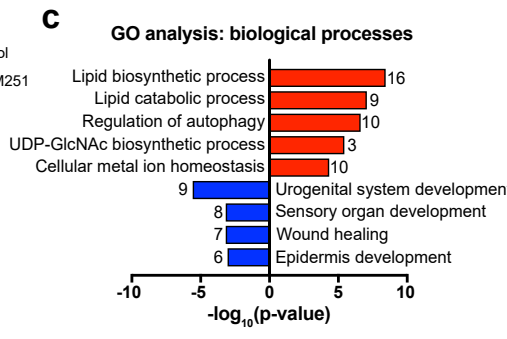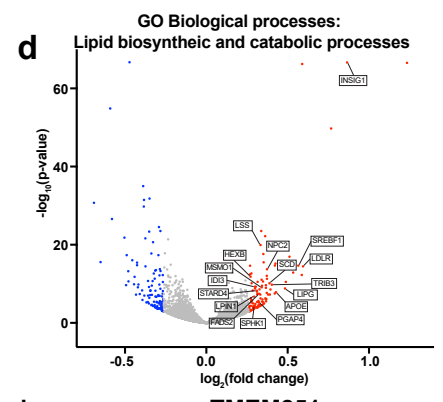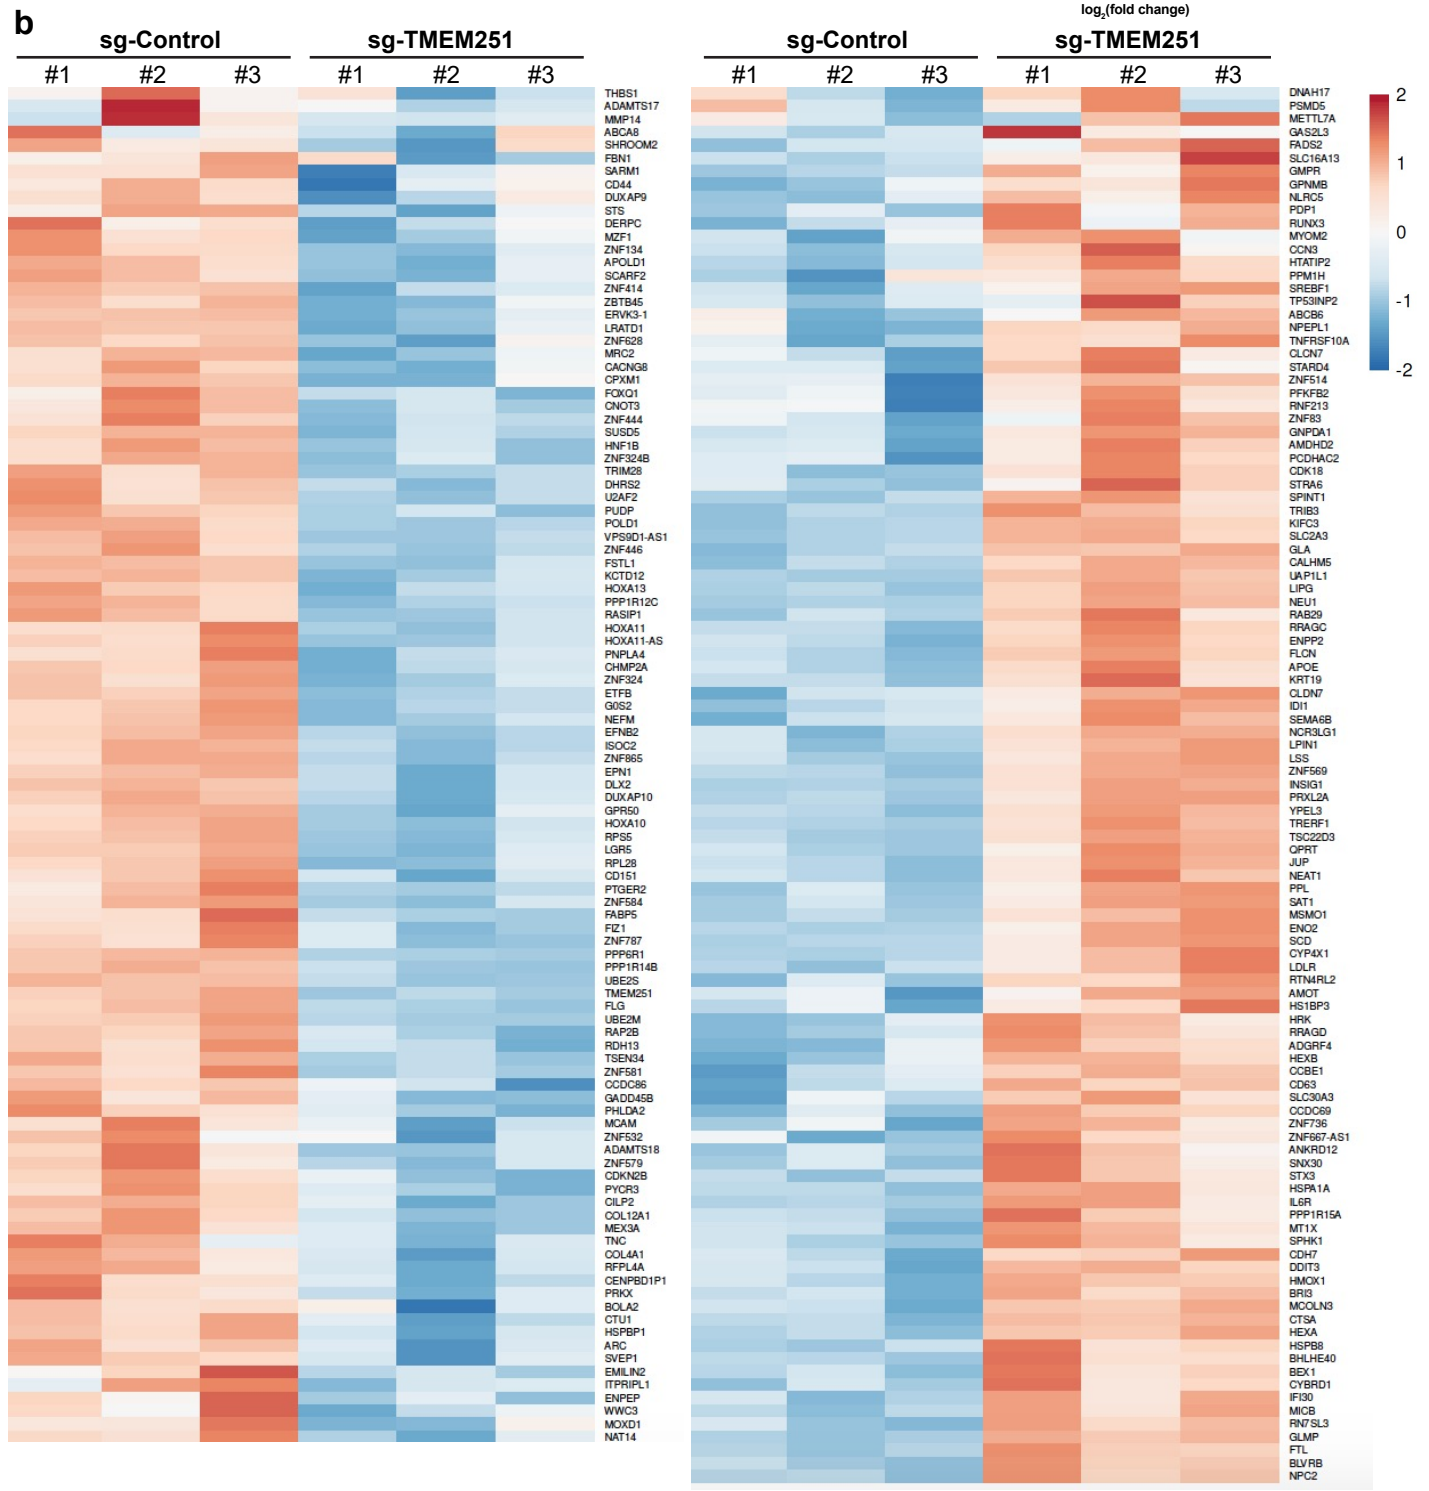

**Supplementary Figure 3: RNA sequencing analysis of sgTMEM251 cells vs. control cells.**

**(a)** Principal component analysis (PCA) of RNA-sequencing. **(b)** A heatmap of 211 DEGs altered in sgTMEM251 vs. control cells. **(c)** GO biological processes analysis of DEGs altered in sgTMEM251 (n=3 independent replicates) vs. control (n=3 independent replicates) cells. The number of genes in each pathway is indicated. **(d)** A Volcano plot of RNA-seq analysis of sgTMEM251 (n=3 independent replicates) vs. control (n=3 independent replicates) cells.

Annotated genes are classified in lipid biosynthetic and catabolic processes. Related to Figure 3.

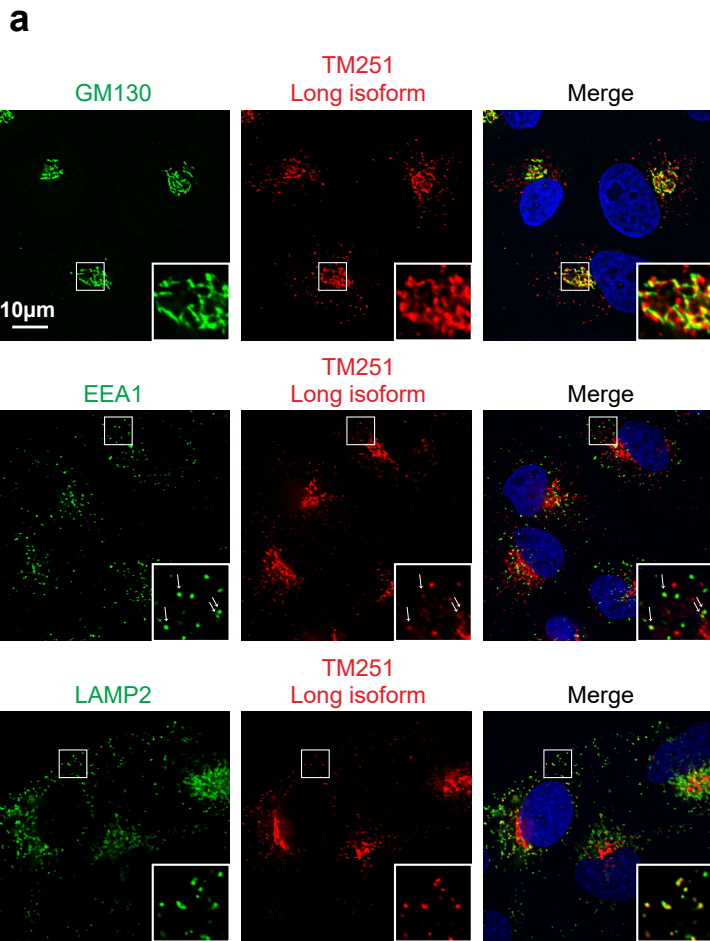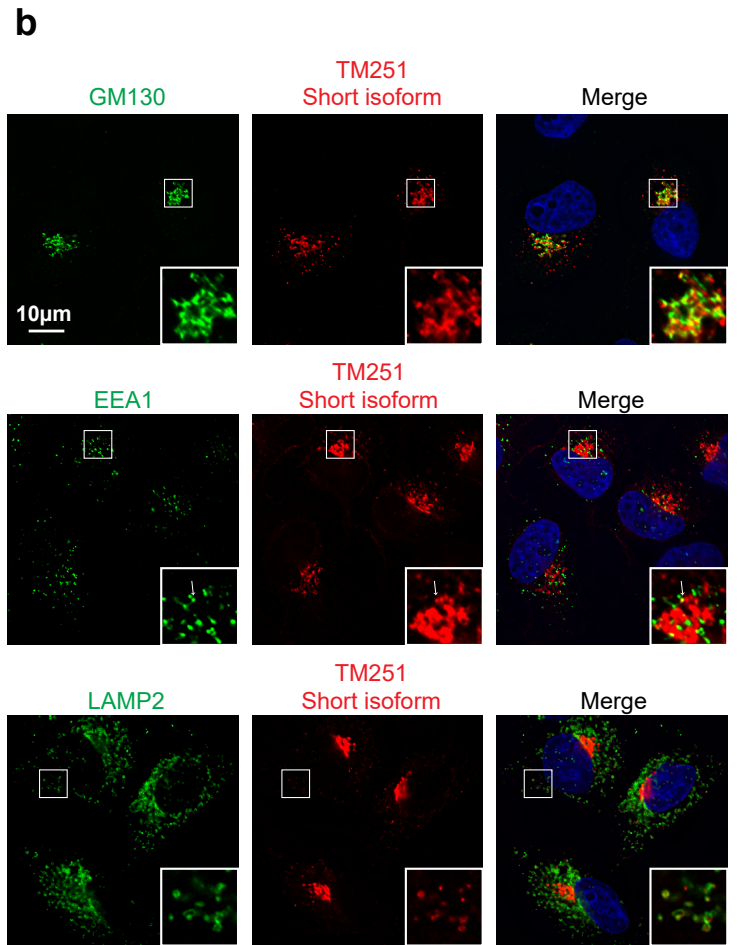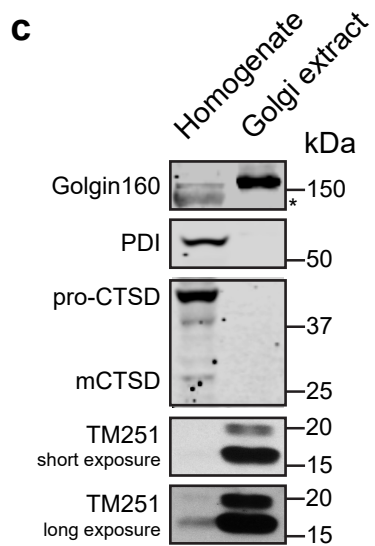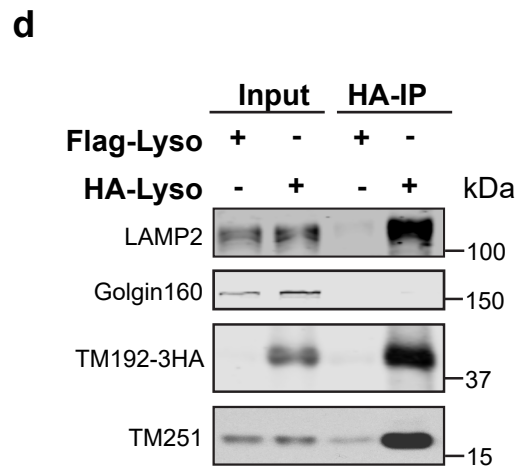

**Supplementary Figure 4: Subcellular localization of TMEM251. (a-b)** Immunofluorescence showing the localization of overexpressed long and short isoform of TMEM251 in HeLa cells (n=50 cells from three independent replicates) co-stained with GM130, EEA1, and LAMP2. Scale bar: 10  $\mu$ m. **(c)** Endogenous TMEM251 in rat liver Golgi extract. n=2 independent replicates. **(d)** Endogenous TMEM251 in purified lysosomes from HEK293T cells. n=3 independent replicates. Related to Figure 5.

**a****GNPTAB**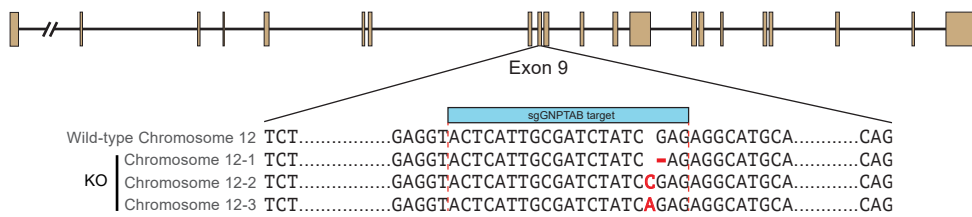**b****GNPTAB**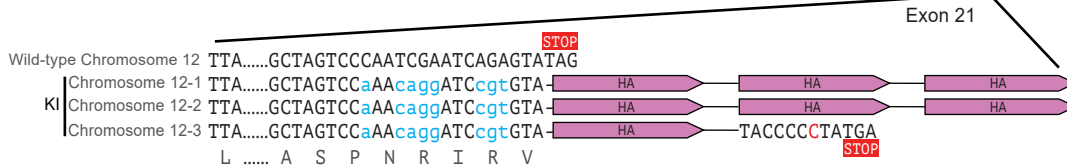**c**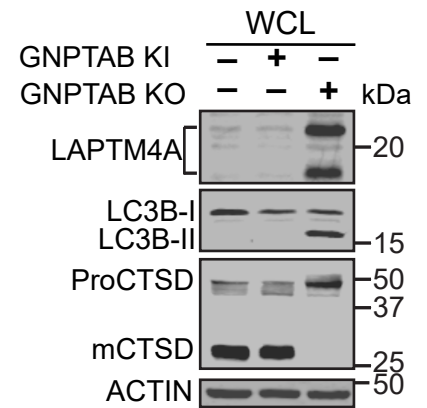**d**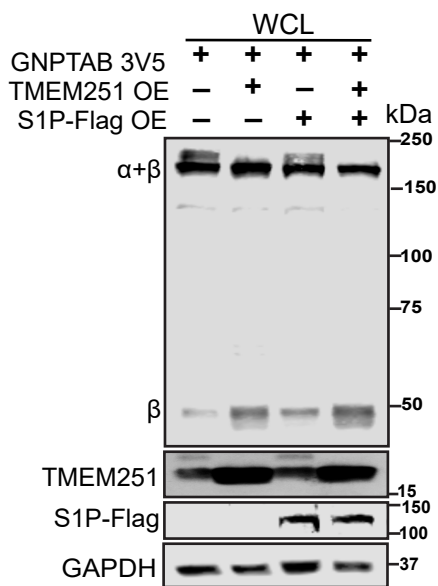**e**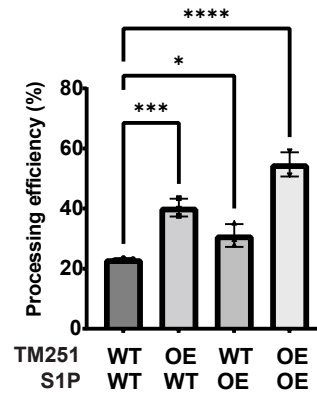**f**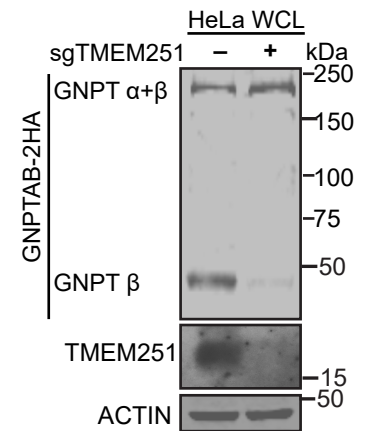**g**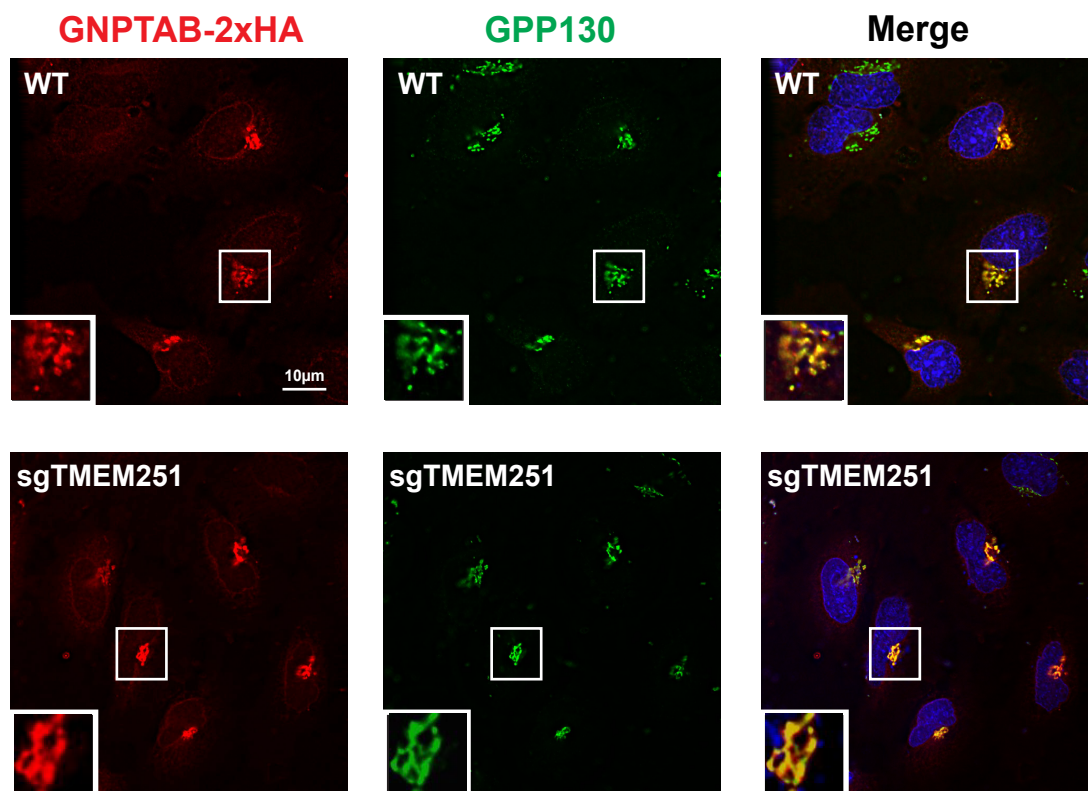

**Supplementary Figure 5: TMEM251 functions at the cleavage step of GNPT  $\alpha/\beta$  precursor**

**by S1P. (a)** Sequencing analysis to confirm the genotype of GNPTAB single colony KO

HEK293T cells. All three chromosomes from the same single colony cell contain either 1 bp deletion or insertion (highlighted in red), which leads to a frameshift, indicating a complete KO of GNPTAB protein. **(b)** Sequencing analysis of the GNPTAB-3xHA endogenous knock-in

single colony cells. Two chromosomes from the same single colony cell contain 3x HA insertion, while the third chromosome only contains 1x HA insertion due to a premature stop codon

generated during recombination. Sequences highlighted in blue lower case showed the silencing mutations designed in the KI template to prevent the cutting from Cas9. Sequence highlighted in red showed one bp insertion, which leads to a premature stop codon in the second HA region. **(c)**

Analysis of lysosome function in GNPTAB KO and GNPTAB-3xHA KI cells (n=3 independent replicates). **(d)** Overexpression of TMEM251 stimulated the processing of GNPTAB-3V5. **(e)**

Quantification of GNPTAB-3V5 processing efficiency in d. Mean of n=3 independent replicates is shown. Error bars represent standard deviation. \*:  $p \leq 0.05$ , \*\*\*  $p \leq 0.001$ , \*\*\*\*:  $p \leq 0.0001$ . See

source data file for exact P values. **(f)** The processing of overexpressed GNPTAB-2xHA in WT and TMEM251 KO HeLa cells (n=3 independent replicates). **(g)** Immunofluorescence showing

the localization of overexpressed GNPTAB-2xHA in WT and TMEM251 KO HeLa cells (n=50 cells from three independent replicates) co-stained with GPP130. Scale bar: 10  $\mu\text{m}$ . Related to

Figure 6.



**Supplementary Table 1: Hypersecreted lysosomal enzymes in TMEM251-deficient cells. Log<sub>2</sub>FC>1, p<0.05.**

|         |        |        |       |       |
|---------|--------|--------|-------|-------|
| AGA     | ARSA   | ARSK   | C3    | CPQ   |
| CREG1   | CTSA   | CTSB   | CTSC  | CTSH  |
| CTSL    | CTSV   | DNASE2 | EPDR1 | GAA   |
| GBA     | GGH    | GLB1   | GNS   | GRN   |
| GUSB    | HEXA   | HEXB   | IDS   | LGMN  |
| LIPA    | MAN2B1 | MAN2B2 | MANBA | NAGLU |
| NEU1    | NPC2   | PLBD2  | PRCP  | PSAP  |
| RNASET2 | SGSH   | SIAE   | TPP1  |       |

| <b>Supplementary Table 2: Mammalian cell lines used in this study</b> |                                                                                |                                       |
|-----------------------------------------------------------------------|--------------------------------------------------------------------------------|---------------------------------------|
| <i>Cell lines</i>                                                     | <i>Description</i>                                                             | <i>reference/source</i>               |
| Human HEK293                                                          | CRL-1573                                                                       | ATCC                                  |
| Human HEK293T                                                         | CRL-3216                                                                       | ATCC                                  |
| Human HeLa                                                            | CCL-2                                                                          | ATCC                                  |
| Human HEK293, GFP-RNF152                                              | pHAGE2-EF1 $\alpha$ -EGFP-RNF152-IRES-Puro                                     | Zhang et al., 2021                    |
| Human HEK293, GFP-RNF152                                              | pHAGE2-EF1 $\alpha$ -EGFP-RNF152-IRES-mCherry                                  | Zhang et al., 2021                    |
| Human HEK293, GFP-RNF152, Cas9                                        | pHAGE2-EF1 $\alpha$ -EGFP-RNF152-IRES-mCherry, LentiCas9-Blast                 | This study                            |
| Human HEK293, sg1-TMEM251                                             | Polyclonal TMEM251 CRISPR-Cas9 KO with sgRNA-1                                 | This study                            |
| Human HEK293, sg2-TMEM251                                             | Polyclonal TMEM251 CRISPR-Cas9 KO with sgRNA-1                                 | This study                            |
| Human HEK293, sg3-TMEM251 (for RNA-seq)                               | Polyclonal TMEM251 CRISPR-Cas9 KO with sgRNA-3                                 | This study                            |
| Human HEK293, sg1-TMEM251, TMEM251 long isoform                       | Polyclonal TMEM251 CRISPR-Cas9 KO with sgRNA-1, pLenti6.3-TMEM251(long)-BLAST  | This study                            |
| Human HEK293 sg1-TMEM251, TMEM251 short isoform                       | Polyclonal TMEM251 CRISPR-Cas9 KO with sgRNA-1, pLenti6.3-TMEM251(short)-BLAST | This study                            |
| Human HEK293T, TMEM251KO                                              | CRISPR-Cas9 KO of TMEM251, sgRNA-1, single colony.                             | This study                            |
| Human HEK293T, sg-TMEM251                                             | Polyclonal TMEM251 CRISPR-Cas9 KO with sgRNA-1                                 | This study                            |
| Human HEK293T, TMEM251KO, TMEM251 long isoform                        | TMEM251 CRISPR-Cas9 KO, pLenti6.3-TMEM251(long)-BLAST                          | This study                            |
| Human HEK293T, TMEM251KO, TMEM251 short isoform                       | TMEM251 CRISPR-Cas9 KO, pLenti6.3-TMEM251(short)-BLAST                         | This study                            |
| Human HEK293T, FLAG-Lyso                                              | pLJC5-TMEM192-2XFLAG-Puro (Addgene 102929)                                     | This study (Abu-Remaileh et al. 2017) |

|                                                         |                                                                                                              |                                       |
|---------------------------------------------------------|--------------------------------------------------------------------------------------------------------------|---------------------------------------|
| Human HEK293T, HA-Lyso                                  | pLJC5-TMEM192-3XHA-Puro (Addgene 102930)                                                                     | This study (Abu-Remaileh et al. 2017) |
| Human HEK293T, GNPTAB KO                                | CRISPR-Cas9 KO of GNPTAB, single colony.                                                                     | This study                            |
| Human HEK293T, CI-MPR KO                                | CRISPR-Cas9 KO of CI-MPR, single colony.                                                                     | This study                            |
| Human HEK293T, CI-MPR KO, TMEM251KO                     | CRISPR-Cas9 KO of CI-MPR and TMEM251, single colony.                                                         | This study                            |
| Human HEK293T, GNPTAB-3HA knockin                       | CRISPR-Cas9 knockin of 3HA tag the C-terminus of GNPTAB                                                      | This study                            |
| Human HEK293T, GNPTAB-3HA knockin, TMEM251KO            | CRISPR-Cas9 knockin of 3HA tag the C-terminus of GNPTAB, CRISPR-Cas9 KO of TMEM251                           | This study                            |
| Human HEK293T, GNPTAB-3HA knockin, TMEM251KO, TMEM251OE | CRISPR-Cas9 knockin of 3HA tag the C-terminus of GNPTAB, CRISPR-Cas9 KO of TMEM251, pLenti6.3-TMEM251(short) | This study                            |
| Human HeLa, TMEM251KO #1                                | CRISPR-Cas9 KO of TMEM251, sgRNA-1, single colony #1                                                         | This study                            |
| Human HeLa, TMEM251KO #2                                | CRISPR-Cas9 KO of TMEM251, sgRNA-2, single colony #2                                                         | This study                            |
| Human HeLa, sgTMEM251                                   | Polyclonal TMEM251 CRISPR-Cas9 KO with sgRNA-1                                                               | This study                            |
| Human HeLa, TMEM251 long isoform                        | pLenti6.3-TMEM251(long)-BLAST                                                                                | This study                            |
| Human HeLa, TMEM251 short isoform                       | pLenti6.3-TMEM251(short)-BLAST                                                                               | This study                            |

| <b>Supplementary Table 3: Mammalian plasmids used in this study</b> |               |                                                 |                         |
|---------------------------------------------------------------------|---------------|-------------------------------------------------|-------------------------|
| <i>Vector</i>                                                       | <i>Insert</i> | <i>description</i>                              | <i>reference/source</i> |
| pHEK293Ultra (mamp418)                                              | sHF-LIPA      | CMV promoter, N-terminal His <sub>6</sub> -FLAG | Jin et al., 2018        |

|                                              |                          |                                                                              |                                                |
|----------------------------------------------|--------------------------|------------------------------------------------------------------------------|------------------------------------------------|
| pcDNA3.1(-)<br>(mamp415)                     | CTSD-3FLAG               | CMV promoter, C-terminal<br>3FLAG                                            | This study                                     |
| pcDNA3.1(-)<br>(mamp416)                     | CTSZ-3FLAG               | CMV promoter, C-terminal<br>3FLAG                                            | This study                                     |
| pcDNA4.0<br>(mamp410)                        | MBTPS1-FLAG              | CMV promoter, C-terminal<br>FLAG                                             | Chen et al., 2021                              |
| pcDNA4.0<br>(mamp411)                        | MBTPS1<br>(S414A)-FLAG   | CMV promoter, C-terminal<br>FLAG                                             | Chen et al., 2021                              |
| pHAGE2-BSD<br>(Mamp300)                      | TMEM251 long<br>isoform  | EF1 $\alpha$ promoter, Blasticidin<br>selection                              | This study                                     |
| pHPAG2-BSD<br>(Mamp301)                      | TMEM251 short<br>isoform | EF1 $\alpha$ promoter, Blasticidin<br>selection                              | This study                                     |
| pLenti6.3-BSD<br>(Mamp317)                   | TMEM251<br>(short)-3HA   | CMV promoter, Blasticidin<br>selection                                       | This study                                     |
| pHAGE2-IRES-<br>mCherry (Mamp149)            | EGFP-RNF152              | EF1 $\alpha$ promoter, mCherry<br>selection                                  | Zhang et al., 2021                             |
| pLJC5 (Mamp074)                              | TMEM192-<br>2XFLAG       | UbC promoter                                                                 | Abu-Remaileh et al.,<br>2017<br>Addgene 102929 |
| pLJC5 (Mamp 075)                             | TMEM192-<br>3XHA         | UbC promoter                                                                 | Abu-Remaileh et al.,<br>2017<br>Addgene 102930 |
| pSpCas9(BB)-2A-<br>Puro (PX459)<br>(Mamp010) |                          | CRISPR-Cas9 knockout                                                         | Ran et al., 2013<br>Addgene, 48139             |
| Lenti-multi-CRISPR<br>(Mamp194)              |                          | CRISPR-Cas9 knockout                                                         | Cao et al., 2016<br>Addgene 85402              |
| psPAX2 (Mamp094)                             |                          | Lentiviral packaging<br>plasmid                                              | Addgene 12260                                  |
| pMD2.G (Mamp093)                             |                          | VSV-G envelope                                                               | Addgene 12259                                  |
| AG949 (Mamp372)                              | scFv M6P                 | N-terminal IL-2 signal<br>sequence and C-terminal Fc<br>region of Rabbit IgG | University of Geneva,<br>This Study            |

| <b>Supplementary Table 4: primers used for F0 knockout in zebrafish</b> |                                                                 |
|-------------------------------------------------------------------------|-----------------------------------------------------------------|
| <i>Names</i>                                                            | <i>Sequences</i>                                                |
| <i>tmem251</i> sgRNA-1                                                  | GAAATTAATACGACTCACTATATGAATTTCCGTCAGCGGAT<br>GGTTTTAGAGCTAGAAAT |

|                        |                                                                  |
|------------------------|------------------------------------------------------------------|
| <i>tmem251</i> sgRNA-2 | GAAATTAATACGACTCACTATAGGAGCGCAGGCAAAATGG<br>CCGTTTTAGAGCTAGAAAT  |
| <i>tmem251</i> sgRNA-3 | GAAATTAATACGACTCACTATAGAAACACCTGCAGATAGG<br>GAGTTTTAGAGCTAGAAAT  |
| <i>tmem251</i> sgRNA-4 | GAAATTAATACGACTCACTATATGATTGACACCTGAAGATG<br>TGTTTTAGAGCTAGAAAT  |
| <i>gnptab</i> sgRNA-1  | GAAATTAATACGACTCACTATAGGGCTTTACCTGTGTTTCG<br>GGTTTTAGAGCTAGAAAT  |
| <i>gnptab</i> sgRNA-2  | GAAATTAATACGACTCACTATAGAAGGGACTCACCGCCCTT<br>TGTTTTAGAGCTAGAAAT  |
| <i>gnptab</i> sgRNA-3  | GAAATTAATACGACTCACTATAGGGCTGTGCTAACTCTTGG<br>TGTTTTAGAGCTAGAAAT  |
| <i>gnptab</i> sgRNA-4  | GAAATTAATACGACTCACTATAGGAGAGGGATTTCAGACTCC<br>GGTTTTAGAGCTAGAAAT |

## Supplementary References:

Abu-Remaileh M, Wyant GA, Kim C, et al. Lysosomal metabolomics reveals V-ATPase- and mTOR-dependent regulation of amino acid efflux from lysosomes. *Science*. 2017;358(6364):807-813. doi:10.1126/science.aan6298

Cao J, Wu L, Zhang SM, et al. An easy and efficient inducible CRISPR/Cas9 platform with improved specificity for multiple gene targeting. *Nucleic Acids Res*. 2016;44(19):e149. doi:10.1093/nar/gkw660

Chen X, Zhang J, Liu P, et al. Proteolytic processing of secretory pathway kinase Fam20C by site-1 protease promotes biomineralization. *Proc Natl Acad Sci U S A*. 2021;118(32):e2100133118. doi:10.1073/pnas.2100133118

Jin ZC, Kitajima T, Dong W, et al. Genetic disruption of multiple  $\alpha$ 1,2-mannosidases generates mammalian cells producing recombinant proteins with high-mannose-type N-glycans. *J Biol Chem*. 2018;293(15):5572-5584. doi:10.1074/jbc.M117.813030

Zhang W, Yang X, Chen L, et al. A conserved ubiquitin- and ESCRT-dependent pathway internalizes human lysosomal membrane proteins for degradation. *PLoS Biol*. 2021;19(7):e3001361. Published 2021 Jul 23. doi:10.1371/journal.pbio.3001361
