# Supplementary material for: GCAF(TMEM251) regulates lysosome biogenesis by activating the mannose-6-phosphate pathway
Source: PubMed Central journal article supplement (PMC9468337; doi:10.1038/s41467-022-33025-1), 2022-09-12
Supplement: 41467_2022_33025_MOESM3_ESM.pdf [file 41467_2022_33025_MOESM3_ESM.pdf]

## Description of Additional Supplementary Files

File Name: Supplementary Data 1

Description: **Hits from the CRISPR screening.**

File Name: Supplementary Data 2

Description: **Raw data of RNA-seq analysis in WT and 251KO cells.**

File Name: Supplementary Data 3

Description: **Raw data of secretome analysis in WT and 251KO cells.**
